# Supplementary material for: Beyond the (log)book: Comparing accelerometer non-wear detection techniques in toddlers
Source: bioRxiv or medRxiv preprint supplement (doi:10.1101/2024.09.04.24312946), 2024-09-06
Supplement: Supplementary file [file media-1.pdf]

### Supplementary Material 1 – Sample logbook

Note. This is a sample logbook written by the research team which contains no participant data.

#### ACTIVITY DIARY:

In addition to having your child wear the activity monitor for one week, we ask that you keep this diary to monitor the times the activity monitor was put on or taken off. This will help us to understand your child's regular physical activity. Please bring this form along with your child's activity monitor to your next study visit.

\* at grandparents \*

| Event                                                                                             | Example<br>Tues<br>June 19                                             | DAY 1<br>Day: Mon<br>Date: May 16                                      | DAY 2<br>Day: Tues<br>Date: May 17                                     | DAY 3<br>Day: wed<br>Date: May 18                                      | DAY 4<br>Day: Thurs<br>Date: May 19                                    | DAY 5<br>Day: Fri<br>Date: May 20                                      | DAY 6<br>Day: Sat<br>Date: May 21                                      | DAY 7<br>Day: Sun<br>Date: May 22                                      |
|---------------------------------------------------------------------------------------------------|------------------------------------------------------------------------|------------------------------------------------------------------------|------------------------------------------------------------------------|------------------------------------------------------------------------|------------------------------------------------------------------------|------------------------------------------------------------------------|------------------------------------------------------------------------|------------------------------------------------------------------------|
| Time the device was put on                                                                        | 7:10 am                                                                | ~ 7:00 am                                                              | 7:15 am                                                                | 7:45 am                                                                | 6:15 am                                                                | 6:30 am                                                                | 6:50 am                                                                | 7:10 am                                                                |
| Was the device removed for naps?                                                                  | <input checked="" type="checkbox"/> Yes<br><input type="checkbox"/> No | <input checked="" type="checkbox"/> Yes<br><input type="checkbox"/> No | <input type="checkbox"/> Yes<br><input checked="" type="checkbox"/> No | <input type="checkbox"/> Yes<br><input checked="" type="checkbox"/> No | <input checked="" type="checkbox"/> Yes<br><input type="checkbox"/> No | <input type="checkbox"/> Yes<br><input checked="" type="checkbox"/> No | <input checked="" type="checkbox"/> Yes<br><input type="checkbox"/> No | <input checked="" type="checkbox"/> Yes<br><input type="checkbox"/> No |
| Nap Time<br>(Please include both start of nap & wake up time)                                     | 2:30 pm – 3:47 pm                                                      | 12:30 – 2:45 pm                                                        | 1:00 – 3:00 pm                                                         |                                                                        | 12:45 – 2:30 pm                                                        | 1:15 – 3:30 pm                                                         | 12:30 – 2:30 pm                                                        | 1:00 – 3:00 pm<br>* car sleep?                                         |
|                                                                                                   | -                                                                      |                                                                        |                                                                        |                                                                        | * forgot to put device back on                                         |                                                                        |                                                                        |                                                                        |
| Times the device may have been taken off and put back on and reason(s) (e.g. bath, swimming, etc) | 4:45 pm – 5:27 pm (swimming)                                           | ~ 6:30 pm bath                                                         | 6:00 – 6:15 pm bath                                                    | 11:00 – 3:00 pm baby bjorn                                             | 5:45 – 6:15 pm bath                                                    | 11:00 – 11:30 am car ride                                              | 8:00 – 8:15 am charge                                                  | 7:30 – 7:45 pm charge                                                  |
|                                                                                                   | 7:10 pm – 7:37 pm (bath)                                               |                                                                        |                                                                        | * carried                                                              |                                                                        | 6:00 – 6:30 pm bath                                                    | 4:00 – 4:15 pm swim                                                    | 1:00 – 3:00 pm car ride                                                |
|                                                                                                   | -                                                                      | 3:00 – 3:20 pm car ride                                                |                                                                        | 4:30 – 5:00 pm swim                                                    |                                                                        |                                                                        | ~ 6:00 pm bath                                                         | 6:00 – 6:25 pm bath                                                    |
|                                                                                                   | -                                                                      |                                                                        |                                                                        | ~ 5:00 pm bath                                                         |                                                                        |                                                                        |                                                                        |                                                                        |
| Time the device was taken off before bed                                                          | 7:40 pm                                                                | 7:00 pm                                                                | 8:00 pm                                                                | 6:30 pm                                                                | 6:30 pm                                                                | 6:45 pm                                                                | 6:45 pm                                                                | 7:00 pm                                                                |

ID #: Participant 1 Initials: P1 Accelerometer #: XXX / 01

PLEASE SEE THE NEXT PAGE FOR DETAILED INSTRUCTIONS

## Supplementary material 2. Results of TOST equivalency tests.

### Compared to Logbook\_AllWear

[1] "=====

[1] "LogbookAwakeWear\_W"

#### Paired t-test

The equivalence test was non-significant,  $t(752) = -9.7$ ,  $p = 1$   
The null hypothesis test was significant,  $t(752) = -21.5$ ,  $p < 0.01$   
NHST: reject null significance hypothesis that the effect is equal to zero  
TOST: don't reject null equivalence hypothesis

#### TOST Results

|            | t       | df  | p.value |
|------------|---------|-----|---------|
| t-test     | -21.484 | 752 | < 0.001 |
| TOST Lower | -9.703  | 752 | 1       |
| TOST Upper | -33.264 | 752 | < 0.001 |

#### Effect Sizes

|               | Estimate | SE      | C.I.                 | Conf. Level |
|---------------|----------|---------|----------------------|-------------|
| Raw           | -55.9050 | 2.60218 | [-60.1905, -51.6195] | 0.9         |
| Hedges's g(z) | -0.7821  | 0.04164 | [-0.8504, -0.7135]   | 0.9         |

Note: SMD confidence intervals are an approximation. See vignette("SMD\_calcs").

[1] "=====

[1] "Ahmadi\_W"

#### Paired t-test

The equivalence test was significant,  $t(752) = -2.5$ ,  $p < 0.01$   
The null hypothesis test was significant,  $t(752) = 7.194$ ,  $p < 0.01$   
NHST: reject null significance hypothesis that the effect is equal to zero  
TOST: reject null equivalence hypothesis

#### TOST Results

|            | t      | df  | p.value |
|------------|--------|-----|---------|
| t-test     | 7.194  | 752 | < 0.001 |
| TOST Lower | 16.897 | 752 | < 0.001 |
| TOST Upper | -2.509 | 752 | 0.006   |

#### Effect Sizes

|               | Estimate | SE      | C.I.               | Conf. Level |
|---------------|----------|---------|--------------------|-------------|
| Raw           | 22.7292  | 3.15947 | [17.5259, 27.9324] | 0.9         |
| Hedges's g(z) | 0.2619   | 0.03706 | [0.2009, 0.3227]   | 0.9         |

Note: SMD confidence intervals are an approximation. See vignette("SMD\_calcs").

[1] "=====

[1] "vanHees\_W"

#### Paired t-test

The equivalence test was non-significant,  $t(752) = 14.56$ ,  $p = 1$   
The null hypothesis test was significant,  $t(752) = 23.351$ ,  $p < 0.01$   
NHST: reject null significance hypothesis that the effect is equal to zero  
TOST: don't reject null equivalence hypothesis

#### TOST Results

|            | t     | df  | p.value |
|------------|-------|-----|---------|
| t-test     | 23.35 | 752 | < 0.001 |
| TOST Lower | 32.14 | 752 | < 0.001 |
| TOST Upper | 14.56 | 752 | 1       |

#### Effect Sizes

|                 | Estimate | SE      | C.I.               | Conf. Level |
|-----------------|----------|---------|--------------------|-------------|
| Raw             | 81.4597  | 3.48842 | [75.7146, 87.2047] | 0.9         |
| Hedges's $g(z)$ | 0.8501   | 0.04252 | [0.78, 0.9198]     | 0.9         |

Note: SMD confidence intervals are an approximation. See vignette("SMD\_calcs").

[1] "=====

[1] "5min\_0count\_W"

#### Paired t-test

The equivalence test was non-significant,  $t(752) = -6$ ,  $p = 1$   
The null hypothesis test was significant,  $t(752) = -17.2$ ,  $p < 0.01$   
NHST: reject null significance hypothesis that the effect is equal to zero  
TOST: don't reject null equivalence hypothesis

#### TOST Results

|            | t       | df  | p.value |
|------------|---------|-----|---------|
| t-test     | -17.213 | 752 | < 0.001 |
| TOST Lower | -6.048  | 752 | 1       |
| TOST Upper | -28.378 | 752 | < 0.001 |

#### Effect Sizes

|                 | Estimate | SE      | C.I.                 | Conf. Level |
|-----------------|----------|---------|----------------------|-------------|
| Raw             | -47.2602 | 2.74559 | [-51.7819, -42.7386] | 0.9         |
| Hedges's $g(z)$ | -0.6267  | 0.03986 | [-0.692, -0.561]     | 0.9         |

Note: SMD confidence intervals are an approximation. See vignette("SMD\_calcs").

[1] "=====

[1] "10min\_0count\_W"

#### Paired t-test

The equivalence test was non-significant,  $t(752) = 0.91, p = 0.18$   
 The null hypothesis test was significant,  $t(752) = -10.4, p < 0.01$   
 NHST: reject null significance hypothesis that the effect is equal to zero  
 TOST: don't reject null equivalence hypothesis

TOST Results

|            | t        | df  | p.value |
|------------|----------|-----|---------|
| t-test     | -10.3509 | 752 | < 0.001 |
| TOST Lower | 0.9131   | 752 | 0.181   |
| TOST Upper | -21.6149 | 752 | < 0.001 |

Effect Sizes

|               | Estimate | SE      | C.I.                 | Conf. Level |
|---------------|----------|---------|----------------------|-------------|
| Raw           | -28.1699 | 2.72150 | [-32.6519, -23.6879] | 0.9         |
| Hedges's g(z) | -0.3768  | 0.03771 | [-0.4387, -0.3147]   | 0.9         |

Note: SMD confidence intervals are an approximation. See vignette("SMD\_calcs").  
 [1] "=====  
 [1] "20min\_0count\_W"

Paired t-test

The equivalence test was significant,  $t(752) = 8.08, p < 0.01$   
 The null hypothesis test was significant,  $t(752) = -2.87, p < 0.01$   
 NHST: reject null significance hypothesis that the effect is equal to zero  
 TOST: reject null equivalence hypothesis

TOST Results

|            | t       | df  | p.value |
|------------|---------|-----|---------|
| t-test     | -2.869  | 752 | 0.004   |
| TOST Lower | 8.082   | 752 | < 0.001 |
| TOST Upper | -13.819 | 752 | < 0.001 |

Effect Sizes

|               | Estimate | SE      | C.I.                | Conf. Level |
|---------------|----------|---------|---------------------|-------------|
| Raw           | -8.0310  | 2.79941 | [-12.6413, -3.4207] | 0.9         |
| Hedges's g(z) | -0.1044  | 0.03654 | [-0.1645, -0.0444]  | 0.9         |

Note: SMD confidence intervals are an approximation. See vignette("SMD\_calcs").  
 [1] "=====  
 [1] "30min\_0count\_W"

Paired t-test

The equivalence test was significant,  $t(752) = -7.7, p < 0.01$   
 The null hypothesis test was significant,  $t(752) = 2.602, p < 0.01$   
 NHST: reject null significance hypothesis that the effect is equal to zero  
 TOST: reject null equivalence hypothesis

TOST Results

|            |        |     |         |
|------------|--------|-----|---------|
|            | t      | df  | p.value |
| t-test     | 2.602  | 752 | 0.009   |
| TOST Lower | 12.904 | 752 | < 0.001 |
| TOST Upper | -7.700 | 752 | < 0.001 |

Effect Sizes

|               |          |         |                   |             |
|---------------|----------|---------|-------------------|-------------|
|               | Estimate | SE      | C.I.              | Conf. Level |
| Raw           | 7.74203  | 2.97566 | [2.8415, 12.6426] | 0.9         |
| Hedges's g(z) | 0.09472  | 0.03652 | [0.0347, 0.1547]  | 0.9         |

Note: SMD confidence intervals are an approximation. See vignette("SMD\_calcs").

[1] "=====

[1] "60min\_0count\_W"

Paired t-test

The equivalence test was non-significant,  $t(752) = 4.43, p = 1$   
 The null hypothesis test was significant,  $t(752) = 13.443p < 0.01$   
 NHST: reject null significance hypothesis that the effect is equal to zero  
 TOST: don't reject null equivalence hypothesis

TOST Results

|            |        |     |         |
|------------|--------|-----|---------|
|            | t      | df  | p.value |
| t-test     | 13.443 | 752 | < 0.001 |
| TOST Lower | 22.459 | 752 | < 0.001 |
| TOST Upper | 4.427  | 752 | 1       |

Effect Sizes

|               |          |         |                    |             |
|---------------|----------|---------|--------------------|-------------|
|               | Estimate | SE      | C.I.               | Conf. Level |
| Raw           | 45.7063  | 3.40007 | [40.1068, 51.3058] | 0.9         |
| Hedges's g(z) | 0.4894   | 0.03856 | [0.4259, 0.5526]   | 0.9         |

Note: SMD confidence intervals are an approximation. See vignette("SMD\_calcs").

[1] "=====

[1] "90min\_0count\_W"

Paired t-test

The equivalence test was non-significant,  $t(752) = 8.78, p = 1$   
 The null hypothesis test was significant,  $t(752) = 17.188p < 0.01$   
 NHST: reject null significance hypothesis that the effect is equal to zero  
 TOST: don't reject null equivalence hypothesis

TOST Results

|        |        |     |         |
|--------|--------|-----|---------|
|        | t      | df  | p.value |
| t-test | 17.188 | 752 | < 0.001 |

TOST Lower 25.599 752 < 0.001  
TOST Upper 8.777 752 1

#### Effect Sizes

|               | Estimate | SE      | C.I.               | Conf. Level |
|---------------|----------|---------|--------------------|-------------|
| Raw           | 62.6426  | 3.64461 | [56.6403, 68.6448] | 0.9         |
| Hedges's g(z) | 0.6257   | 0.03985 | [0.56, 0.691]      | 0.9         |

Note: SMD confidence intervals are an approximation. See vignette("SMD\_calcs").

[1] "=====

[1] "vanHees\_30/80\_W"

#### Paired t-test

The equivalence test was significant,  $t(752) = 2.71, p < 0.01$

The null hypothesis test was non-significant,  $t(752) = -1.39, p = 0.17$

NHST: don't reject null significance hypothesis that the effect is equal to zero

TOST: reject null equivalence hypothesis

#### TOST Results

|            | t      | df  | p.value |
|------------|--------|-----|---------|
| t-test     | -1.387 | 752 | 0.166   |
| TOST Lower | 2.712  | 752 | 0.003   |
| TOST Upper | -5.486 | 752 | < 0.001 |

#### Effect Sizes

|               | Estimate  | SE      | C.I.               | Conf. Level |
|---------------|-----------|---------|--------------------|-------------|
| Raw           | -10.37302 | 7.47906 | [-22.6902, 1.9441] | 0.9         |
| Hedges's g(z) | -0.05049  | 0.03647 | [-0.1104, 0.0094]  | 0.9         |

Note: SMD confidence intervals are an approximation. See vignette("SMD\_calcs").

[1] "=====

[1] "Choi1s\_W"

#### Paired t-test

The equivalence test was non-significant,  $t(752) = 3.1, p = 1$

The null hypothesis test was significant,  $t(752) = 11.653, p < 0.01$

NHST: reject null significance hypothesis that the effect is equal to zero

TOST: don't reject null equivalence hypothesis

#### TOST Results

|            | t      | df  | p.value |
|------------|--------|-----|---------|
| t-test     | 11.653 | 752 | < 0.001 |
| TOST Lower | 20.210 | 752 | < 0.001 |
| TOST Upper | 3.095  | 752 | 0.999   |

#### Effect Sizes

|               | Estimate | SE      | C.I.               | Conf. Level |
|---------------|----------|---------|--------------------|-------------|
| Raw           | 41.7422  | 3.58223 | [35.8427, 47.6417] | 0.9         |
| Hedges's g(z) | 0.4242   | 0.03805 | [0.3616, 0.4866]   | 0.9         |

Note: SMD confidence intervals are an approximation. See vignette("SMD\_calcs").

[1] "====="

[1] "Choi60s\_W"

Paired t-test

The equivalence test was non-significant,  $t(752) = 4.11$ ,  $p = 1$   
 The null hypothesis test was significant,  $t(752) = 12.981$ ,  $p < 0.01$   
 NHST: reject null significance hypothesis that the effect is equal to zero  
 TOST: don't reject null equivalence hypothesis

TOST Results

|            | t      | df  | p.value   |
|------------|--------|-----|-----------|
| t-test     | 12.981 | 752 | $< 0.001$ |
| TOST Lower | 21.849 | 752 | $< 0.001$ |
| TOST Upper | 4.114  | 752 | 1         |

Effect Sizes

|               | Estimate | SE      | C.I.               | Conf. Level |
|---------------|----------|---------|--------------------|-------------|
| Raw           | 44.8767  | 3.45703 | [39.1834, 50.5701] | 0.9         |
| Hedges's g(z) | 0.4726   | 0.03842 | [0.4093, 0.5356]   | 0.9         |

Note: SMD confidence intervals are an approximation. See vignette("SMD\_calcs").

[1] "====="

[1] "Troiano1s\_W"

Paired t-test

The equivalence test was non-significant,  $t(752) = 2.41$ ,  $p = 0.99$   
 The null hypothesis test was significant,  $t(752) = 11.413$ ,  $p < 0.01$   
 NHST: reject null significance hypothesis that the effect is equal to zero  
 TOST: don't reject null equivalence hypothesis

TOST Results

|            | t      | df  | p.value   |
|------------|--------|-----|-----------|
| t-test     | 11.413 | 752 | $< 0.001$ |
| TOST Lower | 20.415 | 752 | $< 0.001$ |
| TOST Upper | 2.412  | 752 | 0.992     |

Effect Sizes

|               | Estimate | SE      | C.I.               | Conf. Level |
|---------------|----------|---------|--------------------|-------------|
| Raw           | 38.8680  | 3.40551 | [33.2596, 44.4765] | 0.9         |
| Hedges's g(z) | 0.4155   | 0.03798 | [0.353, 0.4778]    | 0.9         |

Note: SMD confidence intervals are an approximation. See vignette("SMD\_calcs").

```
[1] "====="
[1] "Troiano60s_W"
```

Paired t-test

The equivalence test was significant,  $t(752) = -4.8, p < 0.01$   
The null hypothesis test was significant,  $t(752) = 4.736p < 0.01$   
NHST: reject null significance hypothesis that the effect is equal to zero  
TOST: reject null equivalence hypothesis

TOST Results

```
      t df p.value
t-test  4.736 752 < 0.001
TOST Lower 14.306 752 < 0.001
TOST Upper -4.834 752 < 0.001
```

Effect Sizes

|               | Estimate | SE      | C.I.              | Conf. Level |
|---------------|----------|---------|-------------------|-------------|
| Raw           | 15.1695  | 3.20321 | [9.8942, 20.4449] | 0.9         |
| Hedges's g(z) | 0.1724   | 0.03671 | [0.112, 0.2327]   | 0.9         |

Note: SMD confidence intervals are an approximation. See vignette("SMD\_calcs").

**Compared to Logbook\_AwakeWear**

```
[1] "====="
[1] "LogbookAllWear_W"
```

Paired t-test

The equivalence test was non-significant,  $t(752) = 10.74, p = 1$   
The null hypothesis test was significant,  $t(752) = 21.484p < 0.01$   
NHST: reject null significance hypothesis that the effect is equal to zero  
TOST: don't reject null equivalence hypothesis

TOST Results

```
      t df p.value
t-test 21.48 752 < 0.001
TOST Lower 32.23 752 < 0.001
TOST Upper 10.74 752 1
```

Effect Sizes



|               | Estimate | SE      | C.I.               | Conf. Level |
|---------------|----------|---------|--------------------|-------------|
| Raw           | 55.9050  | 2.60218 | [51.6195, 60.1905] | 0.9         |
| Hedges's g(z) | 0.7821   | 0.04164 | [0.7135, 0.8504]   | 0.9         |

Note: SMD confidence intervals are an approximation. See vignette("SMD\_calcs").

[1] "====="

[1] "Ahmadi\_W"

#### Paired t-test

The equivalence test was non-significant,  $t(752) = 13.81$ ,  $p = 1$   
 The null hypothesis test was significant,  $t(752) = 21.431$ ,  $p < 0.01$   
 NHST: reject null significance hypothesis that the effect is equal to zero  
 TOST: don't reject null equivalence hypothesis

#### TOST Results

|            | t     | df  | p.value   |
|------------|-------|-----|-----------|
| t-test     | 21.43 | 752 | $< 0.001$ |
| TOST Lower | 29.05 | 752 | $< 0.001$ |
| TOST Upper | 13.81 | 752 | 1         |

#### Effect Sizes

|               | Estimate | SE      | C.I.               | Conf. Level |
|---------------|----------|---------|--------------------|-------------|
| Raw           | 78.6342  | 3.66921 | [72.5914, 84.6769] | 0.9         |
| Hedges's g(z) | 0.7802   | 0.04162 | [0.7116, 0.8484]   | 0.9         |

Note: SMD confidence intervals are an approximation. See vignette("SMD\_calcs").

[1] "====="

[1] "vanHees\_W"

#### Paired t-test

The equivalence test was non-significant,  $t(752) = 27.45$ ,  $p = 1$   
 The null hypothesis test was significant,  $t(752) = 34.464$ ,  $p < 0.01$   
 NHST: reject null significance hypothesis that the effect is equal to zero  
 TOST: don't reject null equivalence hypothesis

#### TOST Results

|            | t     | df  | p.value   |
|------------|-------|-----|-----------|
| t-test     | 34.46 | 752 | $< 0.001$ |
| TOST Lower | 41.48 | 752 | $< 0.001$ |
| TOST Upper | 27.45 | 752 | 1         |

#### Effect Sizes

|               | Estimate | SE      | C.I.                 | Conf. Level |
|---------------|----------|---------|----------------------|-------------|
| Raw           | 137.365  | 3.98579 | [130.8005, 143.9288] | 0.9         |
| Hedges's g(z) | 1.255    | 0.04872 | [1.1743, 1.3345]     | 0.9         |

Note: SMD confidence intervals are an approximation. See vignette("SMD\_calcs").

[1] "=====  
[1] "5min\_0count\_W"

#### Paired t-test

The equivalence test was significant,  $t(752) = -8.4, p < 0.01$   
The null hypothesis test was significant,  $t(752) = 3.77, p < 0.01$   
NHST: reject null significance hypothesis that the effect is equal to zero  
TOST: reject null equivalence hypothesis

#### TOST Results

|            | t      | df  | p.value |
|------------|--------|-----|---------|
| t-test     | 3.770  | 752 | < 0.001 |
| TOST Lower | 15.965 | 752 | < 0.001 |
| TOST Upper | -8.425 | 752 | < 0.001 |

#### Effect Sizes

|                 | Estimate | SE      | C.I.              | Conf. Level |
|-----------------|----------|---------|-------------------|-------------|
| Raw             | 8.6448   | 2.29311 | [4.8683, 12.4213] | 0.9         |
| Hedges's $g(z)$ | 0.1372   | 0.03661 | [0.077, 0.1974]   | 0.9         |

Note: SMD confidence intervals are an approximation. See vignette("SMD\_calcs").

[1] "=====  
[1] "10min\_0count\_W"

#### Paired t-test

The equivalence test was non-significant,  $t(752) = -0.091, p = 0.46$   
The null hypothesis test was significant,  $t(752) = 10.944, p < 0.01$   
NHST: reject null significance hypothesis that the effect is equal to zero  
TOST: don't reject null equivalence hypothesis

#### TOST Results

|            | t        | df  | p.value |
|------------|----------|-----|---------|
| t-test     | 10.94411 | 752 | < 0.001 |
| TOST Lower | 21.97892 | 752 | < 0.001 |
| TOST Upper | -0.09071 | 752 | 0.464   |

#### Effect Sizes

|                 | Estimate | SE      | C.I.               | Conf. Level |
|-----------------|----------|---------|--------------------|-------------|
| Raw             | 27.7351  | 2.53425 | [23.5615, 31.9087] | 0.9         |
| Hedges's $g(z)$ | 0.3984   | 0.03786 | [0.3361, 0.4605]   | 0.9         |

Note: SMD confidence intervals are an approximation. See vignette("SMD\_calcs").

[1] "=====  
[1] "20min\_0count\_W"

#### Paired t-test

The equivalence test was non-significant,  $t(752) = 6.87, p = 1$   
 The null hypothesis test was significant,  $t(752) = 16.524p < 0.01$   
 NHST: reject null significance hypothesis that the effect is equal to zero  
 TOST: don't reject null equivalence hypothesis

TOST Results

|            | t      | df  | p.value |
|------------|--------|-----|---------|
| t-test     | 16.524 | 752 | < 0.001 |
| TOST Lower | 26.176 | 752 | < 0.001 |
| TOST Upper | 6.872  | 752 | 1       |

Effect Sizes

|               | Estimate | SE     | C.I.               | Conf. Level |
|---------------|----------|--------|--------------------|-------------|
| Raw           | 47.8740  | 2.8973 | [43.1025, 52.6455] | 0.9         |
| Hedges's g(z) | 0.6016   | 0.0396 | [0.5363, 0.6665]   | 0.9         |

Note: SMD confidence intervals are an approximation. See vignette("SMD\_calcs").  
 [1] "=====  
 [1] "30min\_0count\_W"

Paired t-test

The equivalence test was non-significant,  $t(752) = 10.91, p = 1$   
 The null hypothesis test was significant,  $t(752) = 19.459p < 0.01$   
 NHST: reject null significance hypothesis that the effect is equal to zero  
 TOST: don't reject null equivalence hypothesis

TOST Results

|            | t     | df  | p.value |
|------------|-------|-----|---------|
| t-test     | 19.46 | 752 | < 0.001 |
| TOST Lower | 28.01 | 752 | < 0.001 |
| TOST Upper | 10.91 | 752 | 1       |

Effect Sizes

|               | Estimate | SE      | C.I.               | Conf. Level |
|---------------|----------|---------|--------------------|-------------|
| Raw           | 63.6471  | 3.27090 | [58.2603, 69.0339] | 0.9         |
| Hedges's g(z) | 0.7084   | 0.04076 | [0.6412, 0.7752]   | 0.9         |

Note: SMD confidence intervals are an approximation. See vignette("SMD\_calcs").  
 [1] "=====  
 [1] "60min\_0count\_W"

Paired t-test

The equivalence test was non-significant,  $t(752) = 18.49, p = 1$   
 The null hypothesis test was significant,  $t(752) = 25.504p < 0.01$   
 NHST: reject null significance hypothesis that the effect is equal to zero

TOST: don't reject null equivalence hypothesis

TOST Results

```
      t df p.value
t-test 25.50 752 < 0.001
TOST Lower 32.52 752 < 0.001
TOST Upper 18.49 752    1
```

Effect Sizes

|               | Estimate | SE      | C.I.                | Conf. Level |
|---------------|----------|---------|---------------------|-------------|
| Raw           | 101.6113 | 3.98410 | [95.0499, 108.1726] | 0.9         |
| Hedges's g(z) | 0.9285   | 0.04359 | [0.8566, 0.9999]    | 0.9         |

Note: SMD confidence intervals are an approximation. See vignette("SMD\_calcs").

[1] "=====

[1] "90min\_0count\_W"

Paired t-test

The equivalence test was non-significant,  $t(752) = 21.86$ ,  $p = 1$   
The null hypothesis test was significant,  $t(752) = 28.613$ ,  $p < 0.01$   
NHST: reject null significance hypothesis that the effect is equal to zero  
TOST: don't reject null equivalence hypothesis

TOST Results

```
      t df p.value
t-test 28.61 752 < 0.001
TOST Lower 35.36 752 < 0.001
TOST Upper 21.86 752    1
```

Effect Sizes

|               | Estimate | SE      | C.I.                 | Conf. Level |
|---------------|----------|---------|----------------------|-------------|
| Raw           | 118.548  | 4.14310 | [111.7244, 125.3708] | 0.9         |
| Hedges's g(z) | 1.042    | 0.04526 | [0.967, 1.1158]      | 0.9         |

Note: SMD confidence intervals are an approximation. See vignette("SMD\_calcs").

[1] "=====

[1] "vanHees\_30/80\_W"

Paired t-test

The equivalence test was non-significant,  $t(752) = 2.08$ ,  $p = 0.98$   
The null hypothesis test was significant,  $t(752) = 5.402$ ,  $p < 0.01$   
NHST: reject null significance hypothesis that the effect is equal to zero  
TOST: don't reject null equivalence hypothesis

TOST Results

```
      t df p.value
```

t-test 5.402 752 < 0.001  
TOST Lower 8.719 752 < 0.001  
TOST Upper 2.084 752 0.981

Effect Sizes

|               | Estimate | SE      | C.I.               | Conf. Level |
|---------------|----------|---------|--------------------|-------------|
| Raw           | 45.5320  | 8.42914 | [31.6502, 59.4138] | 0.9         |
| Hedges's g(z) | 0.1967   | 0.03679 | [0.1361, 0.257]    | 0.9         |

Note: SMD confidence intervals are an approximation. See vignette("SMD\_calcs").

[1] "=====

[1] "Choi1s\_W"

Paired t-test

The equivalence test was non-significant,  $t(752) = 16.71, p = 1$   
The null hypothesis test was significant,  $t(752) = 23.423, p < 0.01$   
NHST: reject null significance hypothesis that the effect is equal to zero  
TOST: don't reject null equivalence hypothesis

TOST Results

|            | t     | df  | p.value |
|------------|-------|-----|---------|
| t-test     | 23.42 | 752 | < 0.001 |
| TOST Lower | 30.13 | 752 | < 0.001 |
| TOST Upper | 16.71 | 752 | 1       |

Effect Sizes

|               | Estimate | SE      | C.I.               | Conf. Level |
|---------------|----------|---------|--------------------|-------------|
| Raw           | 97.6472  | 4.16894 | [90.7815, 104.513] | 0.9         |
| Hedges's g(z) | 0.8527   | 0.04255 | [0.7825, 0.9224]   | 0.9         |

Note: SMD confidence intervals are an approximation. See vignette("SMD\_calcs").

[1] "=====

[1] "Choi60s\_W"

Paired t-test

The equivalence test was non-significant,  $t(752) = 18.16, p = 1$   
The null hypothesis test was significant,  $t(752) = 25.138, p < 0.01$   
NHST: reject null significance hypothesis that the effect is equal to zero  
TOST: don't reject null equivalence hypothesis

TOST Results

|            | t     | df  | p.value |
|------------|-------|-----|---------|
| t-test     | 25.14 | 752 | < 0.001 |
| TOST Lower | 32.11 | 752 | < 0.001 |
| TOST Upper | 18.16 | 752 | 1       |

Effect Sizes

|               | Estimate | SE      | C.I.                | Conf. Level |
|---------------|----------|---------|---------------------|-------------|
| Raw           | 100.7818 | 4.00914 | [94.1792, 107.3843] | 0.9         |
| Hedges's g(z) | 0.9152   | 0.04341 | [0.8436, 0.9863]    | 0.9         |

Note: SMD confidence intervals are an approximation. See vignette("SMD\_calcs").

[1] "=====

[1] "Troiano1s\_W"

Paired t-test

The equivalence test was non-significant,  $t(752) = 16.93$ ,  $p = 1$

The null hypothesis test was significant,  $t(752) = 24.02$ ,  $p < 0.01$

NHST: reject null significance hypothesis that the effect is equal to zero

TOST: don't reject null equivalence hypothesis

TOST Results

|            | t     | df  | p.value   |
|------------|-------|-----|-----------|
| t-test     | 24.02 | 752 | $< 0.001$ |
| TOST Lower | 31.11 | 752 | $< 0.001$ |
| TOST Upper | 16.93 | 752 | 1         |

Effect Sizes

|               | Estimate | SE      | C.I.               | Conf. Level |
|---------------|----------|---------|--------------------|-------------|
| Raw           | 94.7731  | 3.94565 | [88.275, 101.2711] | 0.9         |
| Hedges's g(z) | 0.8745   | 0.04285 | [0.8038, 0.9446]   | 0.9         |

Note: SMD confidence intervals are an approximation. See vignette("SMD\_calcs").

[1] "=====

[1] "Troiano60s\_W"

Paired t-test

The equivalence test was non-significant,  $t(752) = 12.93$ ,  $p = 1$

The null hypothesis test was significant,  $t(752) = 21.319$ ,  $p < 0.01$

NHST: reject null significance hypothesis that the effect is equal to zero

TOST: don't reject null equivalence hypothesis

TOST Results

|            | t     | df  | p.value   |
|------------|-------|-----|-----------|
| t-test     | 21.32 | 752 | $< 0.001$ |
| TOST Lower | 29.71 | 752 | $< 0.001$ |
| TOST Upper | 12.93 | 752 | 1         |

Effect Sizes

|               | Estimate | SE      | C.I.              | Conf. Level |
|---------------|----------|---------|-------------------|-------------|
| Raw           | 71.0746  | 3.33392 | [65.584, 76.5651] | 0.9         |
| Hedges's g(z) | 0.7761   | 0.04157 | [0.7076, 0.8442]  | 0.9         |

Note: SMD confidence intervals are an approximation. See vignette("SMD\_calcs").
